# Supplementary material for: Safety of Dual Orexin Receptor Antagonist Daridorexant: A Disproportionality Analysis of Publicly Available FAERS Data
Source: MDPI journal article supplement (doi:10.3390/ph17030342), 2024-03-06
Supplement: s1 [file s1]

## *Supplementary Material*

### *Safety of Dual Orexin Receptor Antagonist Daridorexant:*

### *A Disproportionality Analysis of Publicly Available FAERS Data*

**Table S1:** Adverse Drug Reactions Observed in Daridorexant and other Dual Orexin Receptor Antagonists related Individual Case Safety Reports regrouped by High Level Group Terms

| High Level Group Terms (HLGTs)                                                 | Daridorexant ICSRs <sup>a</sup><br>n (%) | Other DORA ICSRs <sup>a</sup><br>n (%) |
|--------------------------------------------------------------------------------|------------------------------------------|----------------------------------------|
| Sleep disorders and disturbances                                               | 326 (38.6)                               | 2264 (25.2)                            |
| Therapeutic and nontherapeutic effects (excl toxicity)                         | 311 (36.8)                               | 3164 (35.2)                            |
| General system disorders NEC                                                   | 194 (23)                                 | 1088 (12.1)                            |
| Neurological disorders NEC                                                     | 114 (13.5)                               | 1181 (13.1)                            |
| Medication errors and other product use errors and issues                      | 102 (12.1)                               | 891 (9.9)                              |
| Headaches                                                                      | 69 (8.2)                                 | 454 (5.1)                              |
| Product quality, supply, distribution, manufacturing and quality system issues | 69 (8.2)                                 | 187 (2.1)                              |
| Disturbances in thinking and perception                                        | 44 (5.2)                                 | 410 (4.6)                              |
| Gastrointestinal signs and symptoms                                            | 41 (4.9)                                 | 346 (3.9)                              |
| Anxiety disorders and symptoms                                                 | 40 (4.7)                                 | 413 (4.6)                              |
| Epidermal and dermal conditions                                                | 34 (4)                                   | 179 (2)                                |
| Sleep disturbances (incl subtypes)                                             | 32 (3.8)                                 | 369 (4.1)                              |
| Allergic conditions                                                            | 30 (3.6)                                 | 45 (0.5)                               |
| Movement disorders (incl parkinsonism)                                         | 26 (3.1)                                 | 238 (2.6)                              |
| Depressed mood disorders and disturbances                                      | 25 (3)                                   | 132 (1.5)                              |
| Overdoses and underdoses NEC                                                   | 23 (2.7)                                 | 273 (3)                                |
| Respiratory disorders NEC                                                      | 22 (2.6)                                 | 175 (1.9)                              |
| Skin appendage conditions                                                      | 21 (2.5)                                 | 90 (1)                                 |

|                                                           |          |           |
|-----------------------------------------------------------|----------|-----------|
| Gastrointestinal motility and defaecation conditions      | 21 (2.5) | 137 (1.5) |
| Cardiac disorders, signs and symptoms NEC                 | 16 (1.9) | 106 (1.2) |
| Suicidal and self-injurious behaviours NEC                | 16 (1.9) | 166 (1.8) |
| Salivary gland conditions                                 | 14 (1.7) | 68 (0.8)  |
| Muscle disorders                                          | 14 (1.7) | 150 (1.7) |
| Mood disorders and disturbances NEC                       | 11 (1.3) | 117 (1.3) |
| Cardiac and vascular investigations (excl enzyme tests)   | 11 (1.3) | 95 (1.1)  |
| Deliria (incl confusion)                                  | 11 (1.3) | 191 (2.1) |
| Changes in physical activity                              | 10 (1.2) | 57 (0.6)  |
| Lifestyle issues                                          | 10 (1.2) | 32 (0.4)  |
| Off label uses and intentional product misuses/use issues | 9 (1.1)  | 105 (1.2) |
| Mental impairment disorders                               | 9 (1.1)  | 189 (2.1) |
| Oral soft tissue conditions                               | 9 (1.1)  | 31 (0.3)  |
| Fatal outcomes                                            | 8 (0.9)  | 43 (0.5)  |
| Urinary tract signs and symptoms                          | 8 (0.9)  | 88 (1)    |
| Inner ear and VIIIth cranial nerve disorders              | 7 (0.8)  | 48 (0.5)  |
| Injuries NEC                                              | 7 (0.8)  | 162 (1.8) |
| Respiratory tract signs and symptoms                      | 7 (0.8)  | 50 (0.6)  |
| Musculoskeletal and connective tissue disorders NEC       | 7 (0.8)  | 90 (1)    |
| Viral infectious disorders                                | 6 (0.7)  | 26 (0.3)  |
| Eye disorders NEC                                         | 6 (0.7)  | 27 (0.3)  |
| Psychiatric and behavioural symptoms NEC                  | 6 (0.7)  | 58 (0.6)  |
| Angioedema and urticaria                                  | 6 (0.7)  | 22 (0.2)  |
| Appetite and general nutritional disorders                | 5 (0.6)  | 52 (0.6)  |
| Cardiac arrhythmias                                       | 5 (0.6)  | 71 (0.8)  |
| Physical examination and organ system status topics       | 5 (0.6)  | 55 (0.6)  |
| Infections - pathogen unspecified                         | 5 (0.6)  | 74 (0.8)  |
| Vision disorders                                          | 4 (0.5)  | 43 (0.5)  |

|                                                                 |         |          |
|-----------------------------------------------------------------|---------|----------|
| Vascular disorders NEC                                          | 3 (0.4) | 18 (0.2) |
| Sexual dysfunctions, disturbances and gender identity disorders | 3 (0.4) | 9 (0.1)  |
| Personality disorders and disturbances in behaviour             | 3 (0.4) | 45 (0.5) |
| Upper respiratory tract disorders (excl infections)             | 3 (0.4) | 28 (0.3) |
| Hepatic and hepatobiliary disorders                             | 2 (0.2) | 42 (0.5) |
| Tongue conditions                                               | 2 (0.2) | 13 (0.1) |
| Cognitive and attention disorders and disturbances              | 2 (0.2) | 7 (0.1)  |
| Therapeutic procedures and supportive care NEC                  | 2 (0.2) | 19 (0.2) |
| Seizures (incl subtypes)                                        | 2 (0.2) | 68 (0.8) |
| Bone disorders (excl congenital and fractures)                  | 1 (0.1) | 9 (0.1)  |
| Bronchial disorders (excl neoplasms)                            | 1 (0.1) | 8 (0.1)  |
| Cytogenetic investigations and genetic analyses                 | 1 (0.1) | 1 (0)    |
| Central nervous system vascular disorders                       | 1 (0.1) | 37 (0.4) |
| Aural disorders NEC                                             | 1 (0.1) | 1 (0)    |
| Decreased and nonspecific blood pressure disorders and shock    | 1 (0.1) | 16 (0.2) |
| Cranial nerve disorders (excl neoplasms)                        | 1 (0.1) | 7 (0.1)  |
| Ocular infections, irritations and inflammations                | 1 (0.1) | 12 (0.1) |
| Urolithiases                                                    | 1 (0.1) | 3 (0)    |
| Toxicology and therapeutic drug monitoring                      | 1 (0.1) | 20 (0.2) |
| Skin vascular abnormalities                                     | 1 (0.1) | 5 (0.1)  |
| Renal disorders (excl nephropathies)                            | 1 (0.1) | 27 (0.3) |
| Psychiatric disorders NEC                                       | 1 (0.1) | 56 (0.6) |
| Metabolic, nutritional and blood gas investigations             | 1 (0.1) | 26 (0.3) |
| Ocular sensory symptoms NEC                                     | 1 (0.1) | 7 (0.1)  |
| Dental and gingival conditions                                  | 1 (0.1) | 4 (0)    |
| Nervous system, skull and spine therapeutic procedures          | 1 (0.1) | 1 (0)    |
| Vulvovaginal disorders (excl infections and inflammations)      | 1 (0.1) | 2 (0)    |
| Middle ear disorders (excl congenital)                          | 1 (0.1) | 1 (0)    |

|                                                         |         |          |
|---------------------------------------------------------|---------|----------|
| Joint disorders                                         | 1 (0.1) | 37 (0.4) |
| Hearing disorders                                       | 1 (0.1) | 11 (0.1) |
| Gastrointestinal haemorrhages NEC                       | 1 (0.1) | 8 (0.1)  |
| Prostatic disorders (excl infections and inflammations) | 1 (0.1) | 5 (0.1)  |

<sup>a</sup>ICSR: Individual Case Safety Report

**Table S2:** Adverse Drug Reactions Observed in Daridorexant and other Dual Orexin Receptor Antagonists related Individual Case Safety Reports by High Level Group Terms and Preferred Terms

| High Level Group Terms (HLGTs)                         | Preferred Terms (PTs)                 | Daridorexant ICSRs <sup>a</sup><br>N (%) | Other DORA<br>ICSRs <sup>a</sup><br>N (%) |
|--------------------------------------------------------|---------------------------------------|------------------------------------------|-------------------------------------------|
| Sleep disorders and disturbances                       | Nightmare                             | 146 (17.3)                               | 729 (8.1)                                 |
|                                                        | Insomnia                              | 80 (9.5)                                 | 449 (5)                                   |
|                                                        | Abnormal dreams                       | 64 (7.6)                                 | 588 (6.5)                                 |
|                                                        | Somnambulism                          | 18 (2.1)                                 | 127 (1.4)                                 |
|                                                        | Middle insomnia                       | 15 (1.8)                                 | 159 (1.8)                                 |
|                                                        | Poor quality sleep                    | 10 (1.2)                                 | 187 (2.1)                                 |
|                                                        | Sleep terror                          | 9 (1.1)                                  | 52 (0.6)                                  |
|                                                        | Sleep-related eating disorder         | 4 (0.5)                                  | 16 (0.2)                                  |
|                                                        | Initial insomnia                      | 4 (0.5)                                  | 69 (0.8)                                  |
|                                                        | Hypnagogic hallucination              | 3 (0.4)                                  | 8 (0.1)                                   |
|                                                        | Sleep talking                         | 2 (0.2)                                  | 10 (0.1)                                  |
|                                                        | Parasomnia                            | 2 (0.2)                                  | 5 (0.1)                                   |
|                                                        | Abnormal sleep-related event          | 2 (0.2)                                  | 32 (0.4)                                  |
|                                                        | Sleep disorder                        | 1 (0.1)                                  | 170 (1.9)                                 |
| Therapeutic and nontherapeutic effects (excl toxicity) | Drug ineffective                      | 233 (27.6)                               | 2699 (30)                                 |
|                                                        | Therapeutic product effect incomplete | 33 (3.9)                                 | 167 (1.9)                                 |
|                                                        | Therapeutic product effect delayed    | 18 (2.1)                                 | 51 (0.6)                                  |
|                                                        | Therapeutic product effect variable   | 8 (0.9)                                  | 10 (0.1)                                  |
|                                                        | Therapeutic product effect decreased  | 8 (0.9)                                  | 73 (0.8)                                  |
|                                                        | Drug intolerance                      | 5 (0.6)                                  | 14 (0.2)                                  |
|                                                        | Drug interaction                      | 4 (0.5)                                  | 41 (0.5)                                  |
|                                                        | Therapeutic response unexpected       | 4 (0.5)                                  | 35 (0.4)                                  |
|                                                        | Drug effect less than expected        | 1 (0.1)                                  | 9 (0.1)                                   |

|                              |                                |          |           |
|------------------------------|--------------------------------|----------|-----------|
|                              | Treatment failure              | 1 (0.1)  | 6 (0.1)   |
|                              | Drug withdrawal syndrome       | 1 (0.1)  | 4 (0)     |
|                              | Therapeutic response delayed   | 1 (0.1)  | 14 (0.2)  |
| General system disorders NEC | Feeling abnormal               | 64 (7.6) | 395 (4.4) |
|                              | Fatigue                        | 45 (5.3) | 209 (2.3) |
|                              | Hangover                       | 20 (2.4) | 63 (0.7)  |
|                              | Illness                        | 17 (2)   | 10 (0.1)  |
|                              | Malaise                        | 12 (1.4) | 116 (1.3) |
|                              | Asthenia                       | 6 (0.7)  | 52 (0.6)  |
|                              | Feeling jittery                | 6 (0.7)  | 51 (0.6)  |
|                              | Energy increased               | 5 (0.6)  | 8 (0.1)   |
|                              | Crying                         | 5 (0.6)  | 19 (0.2)  |
|                              | Concomitant disease aggravated | 4 (0.5)  | -         |
|                              | Chest pain                     | 4 (0.5)  | 30 (0.3)  |
|                              | Pain                           | 4 (0.5)  | 51 (0.6)  |
|                              | Sluggishness                   | 4 (0.5)  | 13 (0.1)  |
|                              | Discomfort                     | 3 (0.4)  | 11 (0.1)  |
|                              | Condition aggravated           | 3 (0.4)  | 16 (0.2)  |
|                              | Screaming                      | 3 (0.4)  | 12 (0.1)  |
|                              | Swelling face                  | 3 (0.4)  | 11 (0.1)  |
|                              | Chills                         | 2 (0.2)  | 19 (0.2)  |
|                              | Chest discomfort               | 2 (0.2)  | 21 (0.2)  |
|                              | Feeling cold                   | 2 (0.2)  | 7 (0.1)   |
|                              | Peripheral swelling            | 2 (0.2)  | 7 (0.1)   |
|                              | Gait disturbance               | 2 (0.2)  | 35 (0.4)  |
|                              | Gait inability                 | 2 (0.2)  | 4 (0)     |
|                              | Performance status decreased   | 1 (0.1)  | -         |
|                              | Influenza like illness         | 1 (0.1)  | 7 (0.1)   |

|                                                           |                                                  |          |           |
|-----------------------------------------------------------|--------------------------------------------------|----------|-----------|
|                                                           | Swelling                                         | 1 (0.1)  | 3 (0)     |
|                                                           | Localised oedema                                 | 1 (0.1)  | (0)       |
|                                                           | Face oedema                                      | 1 (0.1)  | 1 (0)     |
|                                                           | Feeling drunk                                    | 1 (0.1)  | 16 (0.2)  |
| Neurological disorders NEC                                | Somnolence                                       | 55 (6.5) | 600 (6.7) |
|                                                           | Dizziness                                        | 29 (3.4) | 213 (2.4) |
|                                                           | Lethargy                                         | 8 (0.9)  | 25 (0.3)  |
|                                                           | Restless legs syndrome                           | 7 (0.8)  | 34 (0.4)  |
|                                                           | Hypoaesthesia                                    | 6 (0.7)  | 35 (0.4)  |
|                                                           | Sedation                                         | 5 (0.6)  | 36 (0.4)  |
|                                                           | Paraesthesia                                     | 4 (0.5)  | 34 (0.4)  |
|                                                           | Speech disorder                                  | 2 (0.2)  | 27 (0.3)  |
|                                                           | Dysgeusia                                        | 2 (0.2)  | 24 (0.3)  |
|                                                           | Balance disorder                                 | 1 (0.1)  | 23 (0.3)  |
|                                                           | Loss of consciousness                            | 1 (0.1)  | 48 (0.5)  |
|                                                           | Ageusia                                          | 1 (0.1)  | 2 (0)     |
|                                                           | Head discomfort                                  | 1 (0.1)  | 26 (0.3)  |
|                                                           | Myoclonus                                        | 1 (0.1)  | 5 (0.1)   |
|                                                           | Neuralgia                                        | 1 (0.1)  | -         |
|                                                           | Burning sensation                                | 1 (0.1)  | 10 (0.1)  |
|                                                           | Aphasia                                          | 1 (0.1)  | 15 (0.2)  |
| Medication errors and other product use errors and issues | Inappropriate schedule of product administration | 48 (5.7) | 82 (0.9)  |
|                                                           | Wrong technique in product usage process         | 35 (4.1) | 210 (2.3) |
|                                                           | Product prescribing error                        | 8 (0.9)  | 15 (0.2)  |
|                                                           | Product use issue                                | 4 (0.5)  | 108 (1.2) |
|                                                           | Product prescribing issue                        | 4 (0.5)  | 13 (0.1)  |

|                                                                                |                                       |          |           |
|--------------------------------------------------------------------------------|---------------------------------------|----------|-----------|
|                                                                                | Product dispensing error              | 3 (0.4)  | 2 (0)     |
|                                                                                | Contraindicated product administered  | 2 (0.2)  | 9 (0.1)   |
|                                                                                | Intercepted product dispensing error  | 1 (0.1)  | 1 (0)     |
|                                                                                | Intercepted product prescribing error | 1 (0.1)  | 1 (0)     |
|                                                                                | Product storage error                 | 1 (0.1)  | 22 (0.2)  |
|                                                                                | Incorrect dose administered           | 1 (0.1)  | 39 (0.4)  |
| Headaches                                                                      | Headache                              | 59 (7)   | 419 (4.7) |
|                                                                                | Migraine                              | 8 (0.9)  | 38 (0.4)  |
|                                                                                | Migraine with aura                    | 2 (0.2)  | 1 (0)     |
| Product quality, supply, distribution, manufacturing and quality system issues | Product availability issue            | 51 (6)   | 18 (0.2)  |
|                                                                                | Product packaging difficult to open   | 7 (0.8)  | 13 (0.1)  |
|                                                                                | Product taste abnormal                | 2 (0.2)  | 2 (0)     |
|                                                                                | Product physical issue                | 2 (0.2)  | 3 (0)     |
|                                                                                | Product container seal issue          | 2 (0.2)  | -         |
|                                                                                | Product container issue               | 2 (0.2)  | 2 (0)     |
|                                                                                | Product shape issue                   | 1 (0.1)  | 1 (0)     |
|                                                                                | Product after taste                   | 1 (0.1)  | -         |
|                                                                                | Product packaging issue               | 1 (0.1)  | 10 (0.1)  |
|                                                                                | Product quality issue                 | 1 (0.1)  | 67 (0.7)  |
|                                                                                | Product colour issue                  | 1 (0.1)  | 6 (0.1)   |
|                                                                                |                                       |          |           |
| Disturbances in thinking and perception                                        | Hallucination                         | 30 (3.6) | 317 (3.5) |
|                                                                                | Tachyphrenia                          | 5 (0.6)  | 14 (0.2)  |
|                                                                                | Hallucination, visual                 | 3 (0.4)  | 19 (0.2)  |
|                                                                                | Hallucination, auditory               | 2 (0.2)  | 25 (0.3)  |
|                                                                                | Autoscopy                             | 2 (0.2)  | 6 (0.1)   |
|                                                                                | Bradyphrenia                          | 1 (0.1)  | 1 (0)     |
|                                                                                | Thinking abnormal                     | 1 (0.1)  | 31 (0.3)  |
|                                                                                | Delusion                              | 1 (0.1)  | 6 (0.1)   |

|                                     |                      |          |           |
|-------------------------------------|----------------------|----------|-----------|
| Gastrointestinal signs and symptoms | Nausea               | 23 (2.7) | 197 (2.2) |
|                                     | Abdominal discomfort | 8 (0.9)  | 43 (0.5)  |
|                                     | Vomiting             | 7 (0.8)  | 65 (0.7)  |
|                                     | Abdominal pain upper | 5 (0.6)  | 24 (0.3)  |
|                                     | Abdominal pain       | 1 (0.1)  | 20 (0.2)  |
|                                     | Abdominal distension | 1 (0.1)  | 7 (0.1)   |
|                                     | Dyspepsia            | 1 (0.1)  | 18 (0.2)  |
|                                     | Dysphagia            | 1 (0.1)  | 22 (0.2)  |
| Anxiety disorders and symptoms      | Agitation            | 16 (1.9) | 98 (1.1)  |
|                                     | Anxiety              | 14 (1.7) | 203 (2.3) |
|                                     | Nervousness          | 5 (0.6)  | 43 (0.5)  |
|                                     | Panic attack         | 3 (0.4)  | 29 (0.3)  |
|                                     | Fear                 | 1 (0.1)  | 40 (0.4)  |
|                                     | Phobia of driving    | 1 (0.1)  | 1 (0)     |
|                                     | Stress               | 1 (0.1)  | 16 (0.2)  |
| Epidermal and dermal conditions     | Pruritus             | 15 (1.8) | 63 (0.7)  |
|                                     | Rash                 | 15 (1.8) | 68 (0.8)  |
|                                     | Erythema             | 4 (0.5)  | 14 (0.2)  |
|                                     | Skin irritation      | 1 (0.1)  | -         |
|                                     | Skin odour abnormal  | 1 (0.1)  | 1 (0)     |
|                                     | Rash papular         | 1 (0.1)  | 1 (0)     |
|                                     | Psoriasis            | 1 (0.1)  | 2 (0)     |
|                                     | Dermatitis contact   | 1 (0.1)  | -         |
|                                     | Rash erythematous    | 1 (0.1)  | 4 (0)     |
| Sleep disturbances (incl subtypes)  | Sleep paralysis      | 21 (2.5) | 278 (3.1) |
|                                     | Hypersomnia          | 10 (1.2) | 38 (0.4)  |
|                                     | Narcolepsy           | 1 (0.1)  | 8 (0.1)   |
| Allergic conditions                 | Hypersensitivity     | 29 (3.4) | 11 (0.1)  |

|                                                      |                                  |          |           |
|------------------------------------------------------|----------------------------------|----------|-----------|
|                                                      | Drug hypersensitivity            | 1 (0.1)  | 22 (0.2)  |
| Movement disorders (incl parkinsonism)               | Tremor                           | 15 (1.8) | 75 (0.8)  |
|                                                      | Dyskinesia                       | 5 (0.6)  | 17 (0.2)  |
|                                                      | Psychomotor hyperactivity        | 3 (0.4)  | 27 (0.3)  |
|                                                      | Bradykinesia                     | 1 (0.1)  | -         |
|                                                      | Paralysis                        | 1 (0.1)  | 43 (0.5)  |
|                                                      | Resting tremor                   | 1 (0.1)  | -         |
|                                                      | Freezing phenomenon              | 1 (0.1)  | -         |
| Depressed mood disorders and disturbances            | Depression                       | 22 (2.6) | 101 (1.1) |
|                                                      | Depressed mood                   | 3 (0.4)  | 21 (0.2)  |
|                                                      | Depression suicidal              | 2 (0.2)  | 1 (0)     |
| Overdoses and underdoses NEC                         | Intentional overdose             | 17 (2)   | 56 (0.6)  |
|                                                      | Prescribed overdose              | 3 (0.4)  | 21 (0.2)  |
|                                                      | Overdose                         | 3 (0.4)  | 133 (1.5) |
|                                                      | Prescribed underdose             | 1 (0.1)  | 7 (0.1)   |
| Respiratory disorders NEC                            | Dyspnoea                         | 20 (2.4) | 102 (1.1) |
|                                                      | Respiratory tract congestion     | 1 (0.1)  | -         |
|                                                      | Cough                            | 1 (0.1)  | 28 (0.3)  |
| Gastrointestinal motility and defaecation conditions | Diarrhoea                        | 15 (1.8) | 98 (1.1)  |
|                                                      | Constipation                     | 4 (0.5)  | 23 (0.3)  |
|                                                      | Gastrooesophageal reflux disease | 1 (0.1)  | 13 (0.1)  |
|                                                      | Diarrhoea haemorrhagic           | 1 (0.1)  | -         |
|                                                      | Irritable bowel syndrome         | 1 (0.1)  | -         |
| Skin appendage conditions                            | Night sweats                     | 11 (1.3) | 30 (0.3)  |
|                                                      | Hyperhidrosis                    | 8 (0.9)  | 48 (0.5)  |
|                                                      | Alopecia                         | 2 (0.2)  | 1 (0)     |
| Cardiac disorders, signs and symptoms NEC            | Palpitations                     | 15 (1.8) | 99 (1.1)  |
|                                                      | Cardiac discomfort               | 1 (0.1)  | -         |

|                                                            |                                                   |          |          |
|------------------------------------------------------------|---------------------------------------------------|----------|----------|
| Suicidal and self-injurious behaviours<br>NEC              | Suicidal ideation                                 | 13 (1.5) | 77 (0.9) |
|                                                            | Suicide attempt                                   | 2 (0.2)  | 40 (0.4) |
|                                                            | Completed suicide                                 | 1 (0.1)  | 35 (0.4) |
| Muscle disorders                                           | Muscle spasms                                     | 5 (0.6)  | 34 (0.4) |
|                                                            | Muscular weakness                                 | 3 (0.4)  | 53 (0.6) |
|                                                            | Muscle twitching                                  | 3 (0.4)  | 12 (0.1) |
|                                                            | Myalgia                                           | 3 (0.4)  | 32 (0.4) |
|                                                            | Muscle rigidity                                   | 1 (0.1)  | 5 (0.1)  |
| Salivary gland conditions                                  | Dry mouth                                         | 14 (1.7) | 65 (0.7) |
| Cardiac and vascular investigations<br>(excl enzyme tests) | Heart rate increased                              | 5 (0.6)  | 34 (0.4) |
|                                                            | Blood pressure increased                          | 4 (0.5)  | 30 (0.3) |
|                                                            | Heart rate irregular                              | 1 (0.1)  | 4 (0)    |
|                                                            | Blood pressure decreased                          | 1 (0.1)  | 15 (0.2) |
| Deliria (incl confusion)                                   | Confusional state                                 | 7 (0.8)  | 79 (0.9) |
|                                                            | Delirium                                          | 2 (0.2)  | 89 (1)   |
|                                                            | Disorientation                                    | 2 (0.2)  | 31 (0.3) |
| Mood disorders and disturbances<br>NEC                     | Irritability                                      | 4 (0.5)  | 38 (0.4) |
|                                                            | Mood swings                                       | 2 (0.2)  | 3 (0)    |
|                                                            | Mood altered                                      | 2 (0.2)  | 14 (0.2) |
|                                                            | Frustration tolerance decreased                   | 1 (0.1)  | 10 (0.1) |
|                                                            | Emotional distress                                | 1 (0.1)  | 6 (0.1)  |
|                                                            | Euphoric mood                                     | 1 (0.1)  | 10 (0.1) |
| Changes in physical activity                               | Restlessness                                      | 10 (1.2) | 53 (0.6) |
| Lifestyle issues                                           | Loss of personal independence in daily activities | 7 (0.8)  | 7 (0.1)  |
|                                                            | Impaired driving ability                          | 2 (0.2)  | 8 (0.1)  |
|                                                            | Impaired work ability                             | 2 (0.2)  | 5 (0.1)  |
| Mental impairment disorders                                | Disturbance in attention                          | 5 (0.6)  | 24 (0.3) |

|                                                           |                               |         |           |
|-----------------------------------------------------------|-------------------------------|---------|-----------|
|                                                           | Memory impairment             | 3 (0.4) | 73 (0.8)  |
|                                                           | Amnesia                       | 1 (0.1) | 60 (0.7)  |
| Off label uses and intentional product misuses/use issues | Intentional product misuse    | 3 (0.4) | 42 (0.5)  |
|                                                           | Off label use                 | 3 (0.4) | 38 (0.4)  |
|                                                           | Intentional dose omission     | 2 (0.2) | 4 (0)     |
|                                                           | Intentional product use issue | 1 (0.1) | 21 (0.2)  |
|                                                           |                               |         |           |
| Oral soft tissue conditions                               | Lip swelling                  | 3 (0.4) | 8 (0.1)   |
|                                                           | Stomatitis                    | 2 (0.2) | 2 (0)     |
|                                                           | Lip exfoliation               | 1 (0.1) | -         |
|                                                           | Cheilitis                     | 1 (0.1) | -         |
|                                                           | Hypoaesthesia oral            | 1 (0.1) | 8 (0.1)   |
|                                                           | Oral mucosal eruption         | 1 (0.1) | -         |
|                                                           | Paraesthesia oral             | 1 (0.1) | 4 (0)     |
| Fatal outcomes                                            | Death                         | 8 (0.9) | 39 (0.4)  |
| Urinary tract signs and symptoms                          | Nocturia                      | 4 (0.5) | 14 (0.2)  |
|                                                           | Pollakiuria                   | 3 (0.4) | 22 (0.2)  |
|                                                           | Urinary incontinence          | 1 (0.1) | 6 (0.1)   |
|                                                           |                               |         |           |
| Injuries NEC                                              | Fall                          | 4 (0.5) | 101 (1.1) |
|                                                           | Concussion                    | 1 (0.1) | 9 (0.1)   |
|                                                           | Scratch                       | 1 (0.1) | 6 (0.1)   |
|                                                           | Gun shot wound                | 1 (0.1) | 1 (0)     |
|                                                           | Accident at home              | 1 (0.1) | -         |
| Inner ear and VIIIth cranial nerve disorders              | Vertigo                       | 5 (0.6) | 14 (0.2)  |
|                                                           | Vertigo positional            | 1 (0.1) | -         |
|                                                           | Tinnitus                      | 1 (0.1) | 31 (0.3)  |
| Musculoskeletal and connective tissue disorders NEC       | Pain in extremity             | 4 (0.5) | 37 (0.4)  |
|                                                           | Musculoskeletal stiffness     | 1 (0.1) | 13 (0.1)  |
|                                                           | Musculoskeletal discomfort    | 1 (0.1) | 3 (0)     |

|                                            |                       |         |          |
|--------------------------------------------|-----------------------|---------|----------|
|                                            | Mobility decreased    | 1 (0.1) | 6 (0.1)  |
| Respiratory tract signs and symptoms       | Throat tightness      | 3 (0.4) | 8 (0.1)  |
|                                            | Oropharyngeal pain    | 1 (0.1) | 6 (0.1)  |
|                                            | Snoring               | 1 (0.1) | 1 (0)    |
|                                            | Yawning               | 1 (0.1) | 2 (0)    |
|                                            | Throat irritation     | 1 (0.1) | 2 (0)    |
| Angioedema and urticaria                   | Urticaria             | 6 (0.7) | 19 (0.2) |
| Eye disorders NEC                          | Eye swelling          | 2 (0.2) | 3 (0)    |
|                                            | Dry eye               | 1 (0.1) | 6 (0.1)  |
|                                            | Eye pain              | 1 (0.1) | 10 (0.1) |
|                                            | Periorbital swelling  | 1 (0.1) | 1 (0)    |
|                                            | Ocular discomfort     | 1 (0.1) | 1 (0)    |
| Psychiatric and behavioural symptoms NEC   | Hypervigilance        | 5 (0.6) | 6 (0.1)  |
|                                            | Abnormal behaviour    | 1 (0.1) | 44 (0.5) |
| Viral infectious disorders                 | COVID-19              | 2 (0.2) | 5 (0.1)  |
|                                            | Influenza             | 2 (0.2) | 11 (0.1) |
|                                            | Gastroenteritis viral | 1 (0.1) | -        |
|                                            | COVID-19 pneumonia    | 1 (0.1) | 1 (0)    |
| Appetite and general nutritional disorders | Decreased appetite    | 4 (0.5) | 21 (0.2) |
|                                            | Increased appetite    | 1 (0.1) | 8 (0.1)  |
| Cardiac arrhythmias                        | Tachycardia           | 4 (0.5) | 13 (0.1) |
|                                            | Arrhythmia            | 1 (0.1) | 12 (0.1) |
| Infections - pathogen unspecified          | Pneumonia             | 2 (0.2) | 25 (0.3) |
|                                            | Sinusitis             | 1 (0.1) | 5 (0.1)  |
|                                            | Pharyngitis           | 1 (0.1) | 1 (0)    |
|                                            | Oral infection        | 1 (0.1) | -        |
|                                            | Infected skin ulcer   | 1 (0.1) | -        |
|                                            | Weight increased      | 3 (0.4) | 37 (0.4) |

|                                                                 |                               |         |          |
|-----------------------------------------------------------------|-------------------------------|---------|----------|
| Physical examination and organ system status topics             | Body temperature increased    | 2 (0.2) | 1 (0)    |
| Vision disorders                                                | Vision blurred                | 2 (0.2) | 16 (0.2) |
|                                                                 | Photopsia                     | 1 (0.1) | 6 (0.1)  |
|                                                                 | Visual impairment             | 1 (0.1) | 16 (0.2) |
|                                                                 | Diplopia                      | 1 (0.1) | 2 (0)    |
| Personality disorders and disturbances in behaviour             | Paranoia                      | 2 (0.2) | 10 (0.1) |
|                                                                 | Aggression                    | 1 (0.1) | 27 (0.3) |
| Sexual dysfunctions, disturbances and gender identity disorders | Disturbance in sexual arousal | 2 (0.2) | -        |
|                                                                 | Hypersexuality                | 1 (0.1) | 1 (0)    |
| Upper respiratory tract disorders (excl infections)             | Nasal congestion              | 1 (0.1) | 3 (0)    |
|                                                                 | Epistaxis                     | 1 (0.1) | 7 (0.1)  |
|                                                                 | Pharyngeal swelling           | 1 (0.1) | -        |
| Vascular disorders NEC                                          | Hot flush                     | 3 (0.4) | 8 (0.1)  |
| Cognitive and attention disorders and disturbances              | Mental fatigue                | 1 (0.1) | 1 (0)    |
|                                                                 | Daydreaming                   | 1 (0.1) | 4 (0)    |
| Hepatic and hepatobiliary disorders                             | Liver disorder                | 1 (0.1) | 8 (0.1)  |
|                                                                 | Hepatic pain                  | 1 (0.1) | 1 (0)    |
| Seizures (incl subtypes)                                        | Seizure                       | 1 (0.1) | 52 (0.6) |
|                                                                 | Seizure like phenomena        | 1 (0.1) | 3 (0)    |
| Therapeutic procedures and supportive care NEC                  | Interventional procedure      | 1 (0.1) | -        |
|                                                                 | Therapy interrupted           | 1 (0.1) | -        |
| Tongue conditions                                               | Swollen tongue                | 2 (0.2) | 11 (0.1) |
| Aural disorders NEC                                             | Ear discomfort                | 1 (0.1) | 1 (0)    |
| Bone disorders (excl congenital and fractures)                  | Spinal disorder               | 1 (0.1) | 3 (0)    |
| Bronchial disorders (excl neoplasms)                            | Asthma                        | 1 (0.1) | 3 (0)    |

|                                                              |                                            |         |          |
|--------------------------------------------------------------|--------------------------------------------|---------|----------|
| Central nervous system vascular disorders                    | Transient ischaemic attack                 | 1 (0.1) | 5 (0.1)  |
| Cranial nerve disorders (excl neoplasms)                     | Parosmia                                   | 1 (0.1) | 1 (0)    |
| Cytogenetic investigations and genetic analyses              | Gene mutation identification test positive | 1 (0.1) | -        |
| Decreased and nonspecific blood pressure disorders and shock | Hypotension                                | 1 (0.1) | 8 (0.1)  |
| Dental and gingival conditions                               | Noninfective gingivitis                    | 1 (0.1) | -        |
| Gastrointestinal haemorrhages NEC                            | Rectal haemorrhage                         | 1 (0.1) | 2 (0)    |
| Hearing disorders                                            | Deafness                                   | 1 (0.1) | 2 (0)    |
| Joint disorders                                              | Rheumatoid arthritis                       | 1 (0.1) | -        |
|                                                              | Joint swelling                             | 1 (0.1) | 1 (0)    |
|                                                              | Joint stiffness                            | 1 (0.1) | 2 (0)    |
| Metabolic, nutritional and blood gas investigations          | Blood glucose increased                    | 1 (0.1) | 9 (0.1)  |
| Middle ear disorders (excl congenital)                       | Middle ear effusion                        | 1 (0.1) | (0)      |
| Nervous system, skull and spine therapeutic procedures       | Spinal operation                           | 1 (0.1) | 1 (0)    |
| Ocular infections, irritations and inflammations             | Eye pruritus                               | 1 (0.1) | 1 (0)    |
| Ocular sensory symptoms NEC                                  | Asthenopia                                 | 1 (0.1) | 3 (0)    |
| Prostatic disorders (excl infections and inflammations)      | Prostatic disorder                         | 1 (0.1) | 2 (0)    |
| Psychiatric disorders NEC                                    | Mental disorder                            | 1 (0.1) | 22 (0.2) |
| Renal disorders (excl nephropathies)                         | Renal disorder                             | 1 (0.1) | 3 (0)    |
| Skin vascular abnormalities                                  | Skin haemorrhage                           | 1 (0.1) | 1 (0)    |
| Toxicology and therapeutic drug monitoring                   | Drug screen false positive                 | 1 (0.1) | 3 (0)    |

|                                                               |                      |         |       |
|---------------------------------------------------------------|----------------------|---------|-------|
| Urolithiases                                                  | Nephrolithiasis      | 1 (0.1) | 3 (0) |
| Vulvovaginal disorders (excl<br>infections and inflammations) | Vaginal disorder     | 1 (0.1) | -     |
|                                                               | Vulvovaginal dryness | 1 (0.1) | 1 (0) |

<sup>a</sup>ICSR: Individual Case Safety Report

**Table S3:** Disproportionality analysis at Preferred Terms level for each High Level Group Term observed in daridorexant-related Individual Case Safety Reports.

| High Level Group Term (HLGT)            | Preferred Term (PT)           | Daridorexant ICSRs <sup>a</sup> | Daridorexant VS RG1 <sup>b</sup><br>ROR [95%CI] | Daridorexant VS RG2 <sup>c</sup><br>ROR [95%CI] |
|-----------------------------------------|-------------------------------|---------------------------------|-------------------------------------------------|-------------------------------------------------|
| Sleep disorders and disturbances        | Hypnagogic hallucination      | 3                               | 267.22 [85.32, 836.95]                          | 4 [1.06, 15.1]                                  |
|                                         | Nightmare                     | 146                             | 113.74 [95.13, 136]                             | 2.35 [1.93, 2.85]                               |
|                                         | Sleep-related eating disorder | 4                               | 113.13 [42.23, 303.02]                          | 2.67 [0.89, 7.99]                               |
|                                         | Parasomnia                    | 2                               | 78.95 [19.66, 317.15]                           | 4.26 [0.83, 22]                                 |
|                                         | Sleep terror                  | 9                               | 61.64 [31.93, 119.02]                           | 1.85 [0.91, 3.77]                               |
|                                         | Somnambulism                  | 18                              | 56.94 [35.67, 90.9]                             | 1.51 [0.91, 2.48]                               |
|                                         | Abnormal dreams               | 64                              | 52.79 [40.9, 68.13]                             | 1.16 [0.89, 1.52]                               |
|                                         | Abnormal sleep-related event  | 2                               | 33.14 [8.26, 132.9]                             | 0.66 [0.16, 2.77]                               |
|                                         | Sleep talking                 | 2                               | 27.46 [6.85, 110.11]                            | 2.13 [0.47, 9.74]                               |
|                                         | Middle insomnia               | 15                              | 19.82 [11.89, 33.03]                            | 0.98 [0.58, 1.68]                               |
|                                         | Poor quality sleep            | 10                              | 11.51 [6.17, 21.48]                             | 0.55 [0.29, 1.04]                               |
|                                         | Initial insomnia              | 4                               | 9.91 [3.71, 26.46]                              | 0.6 [0.22, 1.64]                                |
|                                         | Insomnia                      | 80                              | 7.41 [5.88, 9.33]                               | 1.94 [1.51, 2.49]                               |
|                                         | Sleep disorder                | 1                               | 0.36 [0.05, 2.57]                               | 0.06 [0.01, 0.43]                               |
| Sleep disturbances (incl subtypes)      | Sleep paralysis               | 21                              | 389.34 [251.39, 602.97]                         | 0.8 [0.51, 1.25]                                |
|                                         | Narcolepsy                    | 1                               | 12.11 [1.7, 86.1]                               | 1.18 [0.15, 9.34]                               |
|                                         | Hypersomnia                   | 10                              | 8.29 [4.44, 15.47]                              | 2.82 [1.4, 5.68]                                |
| Disturbances in thinking and perception | Autoscopy                     | 2                               | 111.01 [27.6, 446.44]                           | 3.55 [0.72, 17.62]                              |
|                                         | Tachyphrenia                  | 5                               | 33.02 [13.7, 79.61]                             | 3.56 [1.29, 9.82]                               |
|                                         | Hallucination                 | 30                              | 10.3 [7.15, 14.83]                              | 1 [0.68, 1.46]                                  |
|                                         | Hallucination, visual         | 3                               | 3.79 [1.22, 11.77]                              | 1.6 [0.47, 5.39]                                |
|                                         | Bradyphrenia                  | 1                               | 3.36 [0.47, 23.89]                              | 10.65 [0.67, 170.36]                            |
|                                         | Hallucination, auditory       | 2                               | 3.06 [0.76, 12.26]                              | 0.79 [0.19, 3.32]                               |
|                                         | Delusion                      | 1                               | 1.62 [0.23, 11.54]                              | 1.52 [0.19, 12.37]                              |
|                                         | Thinking abnormal             | 1                               | 1.16 [0.16, 8.23]                               | 0.34 [0.05, 2.51]                               |

|                                                                                |                                       |     |                       |                      |
|--------------------------------------------------------------------------------|---------------------------------------|-----|-----------------------|----------------------|
| Therapeutic and nontherapeutic effects (excl toxicity)                         | Therapeutic product effect delayed    | 18  | 46.84 [29.34, 74.75]  | 3.74 [2.18, 6.42]    |
|                                                                                | Therapeutic product effect variable   | 8   | 43.43 [21.63, 87.2]   | 8.58 [3.38, 21.8]    |
|                                                                                | Therapeutic response delayed          | 1   | 8.28 [1.16, 58.87]    | 0.76 [0.1, 5.78]     |
|                                                                                | Therapeutic product effect incomplete | 33  | 7.95 [5.61, 11.26]    | 2.12 [1.45, 3.1]     |
|                                                                                | Drug ineffective                      | 233 | 5.59 [4.81, 6.5]      | 0.87 [0.74, 1.02]    |
|                                                                                | Drug effect less than expected        | 1   | 4.57 [0.64, 32.5]     | 0.97 [0.12, 7.5]     |
|                                                                                | Therapeutic response unexpected       | 4   | 1.8 [0.67, 4.81]      | 1.15 [0.41, 3.24]    |
|                                                                                | Therapeutic product effect decreased  | 8   | 1.78 [0.89, 3.57]     | 1.15 [0.55, 2.4]     |
|                                                                                | Drug intolerance                      | 5   | 1.33 [0.55, 3.21]     | 3.56 [1.29, 9.82]    |
|                                                                                | Drug interaction                      | 4   | 0.7 [0.26, 1.88]      | 0.99 [0.35, 2.76]    |
|                                                                                | Treatment failure                     | 1   | 0.36 [0.05, 2.54]     | 1.77 [0.21, 14.75]   |
|                                                                                | Drug withdrawal syndrome              | 1   | 0.23 [0.03, 1.6]      | 2.66 [0.3, 23.83]    |
| Changes in physical activity                                                   | Restlessness                          | 10  | 6.33 [3.4, 11.82]     | 2.02 [1.02, 3.98]    |
| Middle ear disorders (excl congenital)                                         | Middle ear effusion                   | 1   | 10.84 [1.52, 77.1]    | -                    |
| Product quality, supply, distribution, manufacturing and quality system issues | Product packaging difficult to open   | 7   | 104.91 [49.76, 221.2] | 5.35 [2.15, 13.3]    |
|                                                                                | Product availability issue            | 51  | 97.47 [73.39, 129.45] | 32 [18.61, 55.04]    |
|                                                                                | Product after taste                   | 1   | 55.44 [7.78, 395.19]  | -                    |
|                                                                                | Product container seal issue          | 2   | 41.78 [10.42, 167.6]  | -                    |
|                                                                                | Product shape issue                   | 1   | 24.03 [3.38, 170.98]  | 5.32 [0.48, 58.76]   |
|                                                                                | Product container issue               | 2   | 6.21 [1.55, 24.87]    | 7.1 [1.19, 42.58]    |
|                                                                                | Product colour issue                  | 1   | 5.35 [0.75, 38.02]    | 1.77 [0.21, 14.75]   |
|                                                                                | Product taste abnormal                | 2   | 3.54 [0.88, 14.19]    | 10.66 [1.5, 75.76]   |
|                                                                                | Product packaging issue               | 1   | 2.7 [0.38, 19.19]     | 1.06 [0.14, 8.32]    |
|                                                                                | Product physical issue                | 2   | 2.43 [0.61, 9.74]     | 7.1 [1.19, 42.58]    |
|                                                                                | Product quality issue                 | 1   | 0.15 [0.02, 1.08]     | 0.16 [0.02, 1.12]    |
| Salivary gland conditions                                                      | Dry mouth                             | 14  | 4.17 [2.46, 7.07]     | 2.31 [1.29, 4.14]    |
| Headaches                                                                      | Migraine with aura                    | 2   | 16.56 [4.13, 66.38]   | 21.32 [1.93, 235.34] |
|                                                                                | Headache                              | 59  | 2.27 [1.74, 2.95]     | 1.52 [1.15, 2.01]    |
|                                                                                | Migraine                              | 8   | 2.05 [1.02, 4.12]     | 2.25 [1.05, 4.84]    |
|                                                                                | Mental fatigue                        | 1   | 20.68 [2.91, 147.15]  | 10.65 [0.67, 170.36] |

|                                                                 |                               |    |                        |                      |
|-----------------------------------------------------------------|-------------------------------|----|------------------------|----------------------|
| Cognitive and attention disorders and disturbances              | Daydreaming                   | 1  | 14.73 [2.07, 104.75]   | 2.66 [0.3, 23.83]    |
| Sexual dysfunctions, disturbances and gender identity disorders | Disturbance in sexual arousal | 2  | 50.12 [12.49, 201.1]   | -                    |
|                                                                 | Hypersexuality                | 1  | 14.23 [2, 101.22]      | 10.65 [0.67, 170.36] |
| Psychiatric and behavioural symptoms NEC                        | Hypervigilance                | 5  | 124.4 [51.49, 300.53]  | 8.91 [2.71, 29.25]   |
|                                                                 | Abnormal behaviour            | 1  | 0.53 [0.08, 3.8]       | 0.23 [0.03, 1.67]    |
| Anxiety disorders and symptoms                                  | Phobia of driving             | 1  | 145.1 [20.26, 1039.18] | 10.65 [0.67, 170.36] |
|                                                                 | Agitation                     | 16 | 5.06 [3.09, 8.3]       | 1.72 [1.01, 2.92]    |
|                                                                 | Nervousness                   | 5  | 2.02 [0.84, 4.87]      | 1.24 [0.49, 3.13]    |
|                                                                 | Panic attack                  | 3  | 1.88 [0.6, 5.83]       | 1.1 [0.33, 3.62]     |
|                                                                 | Anxiety                       | 14 | 1.1 [0.65, 1.86]       | 0.72 [0.42, 1.24]    |
|                                                                 | Fear                          | 1  | 0.76 [0.11, 5.4]       | 0.25 [0.03, 1.84]    |
|                                                                 | Stress                        | 1  | 0.33 [0.05, 2.32]      | 0.63 [0.08, 4.7]     |
| Depressed mood disorders and disturbances                       | Depression suicidal           | 2  | 13.3 [3.32, 53.31]     | 21.32 [1.93, 235.34] |
|                                                                 | Depression                    | 22 | 2.13 [1.39, 3.25]      | 2.31 [1.45, 3.67]    |
|                                                                 | Depressed mood                | 3  | 1.36 [0.44, 4.24]      | 1.45 [0.43, 4.86]    |
| Suicidal and self-injurious behaviours NEC                      | Suicidal ideation             | 13 | 3.3 [1.91, 5.7]        | 1.7 [0.94, 3.06]     |
|                                                                 | Suicide attempt               | 2  | 0.84 [0.21, 3.38]      | 0.47 [0.11, 1.95]    |
|                                                                 | Completed suicide             | 1  | 0.37 [0.05, 2.63]      | 0.29 [0.04, 2.09]    |
| Neurological disorders NEC                                      | Restless legs syndrome        | 7  | 8.81 [4.19, 18.54]     | 2.14 [0.95, 4.82]    |
|                                                                 | Somnolence                    | 55 | 6.88 [5.23, 9.04]      | 0.95 [0.71, 1.26]    |
|                                                                 | Sedation                      | 5  | 5.18 [2.15, 12.47]     | 1.37 [0.54, 3.47]    |
|                                                                 | Lethargy                      | 8  | 3.27 [1.63, 6.57]      | 3.43 [1.54, 7.62]    |
|                                                                 | Myoclonus                     | 1  | 2.36 [0.33, 16.75]     | 1.52 [0.19, 12.37]   |
|                                                                 | Head discomfort               | 1  | 1.41 [0.2, 10]         | 0.41 [0.06, 3.01]    |
|                                                                 | Dizziness                     | 29 | 1.36 [0.94, 1.97]      | 1.45 [0.98, 2.15]    |
|                                                                 | Neuralgia                     | 1  | 0.99 [0.14, 7.06]      | -                    |
|                                                                 | Ageusia                       | 1  | 0.91 [0.13, 6.5]       | 5.32 [0.48, 58.76]   |
|                                                                 | Hypoaesthesia                 | 6  | 0.9 [0.4, 2.02]        | 1.83 [0.77, 4.36]    |
|                                                                 | Speech disorder               | 2  | 0.87 [0.22, 3.47]      | 0.79 [0.19, 3.32]    |
|                                                                 | Aphasia                       | 1  | 0.75 [0.11, 5.36]      | 0.71 [0.09, 5.37]    |

|                                                         |                                |    |                        |                     |
|---------------------------------------------------------|--------------------------------|----|------------------------|---------------------|
|                                                         | Dysgeusia                      | 2  | 0.58 [0.15, 2.34]      | 0.89 [0.21, 3.76]   |
|                                                         | Paraesthesia                   | 4  | 0.56 [0.21, 1.51]      | 1.22 [0.43, 3.43]   |
|                                                         | Burning sensation              | 1  | 0.32 [0.04, 2.27]      | 1.06 [0.14, 8.32]   |
|                                                         | Balance disorder               | 1  | 0.26 [0.04, 1.84]      | 0.46 [0.06, 3.42]   |
|                                                         | Loss of consciousness          | 1  | 0.18 [0.03, 1.28]      | 0.22 [0.03, 1.57]   |
| Movement disorders (incl parkinsonism)                  | Resting tremor                 | 1  | 51.02 [7.16, 363.62]   | -                   |
|                                                         | Freezing phenomenon            | 1  | 7.91 [1.11, 56.26]     | -                   |
|                                                         | Bradykinesia                   | 1  | 5.04 [0.71, 35.81]     | -                   |
|                                                         | Psychomotor hyperactivity      | 3  | 4.04 [1.3, 12.55]      | 1.18 [0.36, 3.91]   |
|                                                         | Dyskinesia                     | 5  | 2.88 [1.2, 6.94]       | 3.14 [1.16, 8.53]   |
|                                                         | Tremor                         | 15 | 2.07 [1.24, 3.45]      | 2.15 [1.23, 3.76]   |
|                                                         | Paralysis                      | 1  | 1.6 [0.23, 11.39]      | 0.25 [0.03, 1.79]   |
| Inner ear and VIIIth cranial nerve disorders            | Vertigo positional             | 1  | 13.24 [1.86, 94.14]    | -                   |
|                                                         | Vertigo                        | 5  | 1.86 [0.77, 4.49]      | 3.81 [1.37, 10.62]  |
|                                                         | Tinnitus                       | 1  | 0.51 [0.07, 3.61]      | 0.32 [0.04, 2.35]   |
| Cardiac disorders, signs and symptoms NEC               | Cardiac discomfort             | 1  | 12.15 [1.71, 86.44]    | -                   |
|                                                         | Palpitations                   | 15 | 3.01 [1.8, 5.01]       | 1.61 [0.93, 2.78]   |
| Overdoses and underdoses NEC                            | Intentional overdose           | 17 | 7.73 [4.78, 12.5]      | 2.82 [1.64, 4.83]   |
|                                                         | Prescribed overdose            | 3  | 3.77 [1.21, 11.72]     | 1.52 [0.45, 5.11]   |
|                                                         | Prescribed underdose           | 1  | 1.25 [0.18, 8.85]      | 1.52 [0.19, 12.37]  |
|                                                         | Overdose                       | 3  | 0.34 [0.11, 1.05]      | 0.23 [0.07, 0.72]   |
| Allergic conditions                                     | Hypersensitivity               | 29 | 3.78 [2.61, 5.47]      | 24.53 [12.7, 47.37] |
|                                                         | Drug hypersensitivity          | 1  | 0.12 [0.02, 0.82]      | 0.44 [0.06, 3.27]   |
| Prostatic disorders (excl infections and inflammations) | Prostatic disorder             | 1  | 3.85 [0.54, 27.36]     | 5.32 [0.48, 58.76]  |
| General system disorders NEC                            | Hangover                       | 20 | 127.92 [81.98, 199.62] | 3.38 [2.04, 5.61]   |
|                                                         | Energy increased               | 5  | 18.7 [7.76, 45.06]     | 6.68 [2.18, 20.47]  |
|                                                         | Concomitant disease aggravated | 4  | 15.43 [5.78, 41.23]    | -                   |
|                                                         | Screaming                      | 3  | 10.74 [3.46, 33.39]    | 2.66 [0.75, 9.46]   |
|                                                         | Sluggishness                   | 4  | 9.02 [3.38, 24.09]     | 3.05 [1, 9.28]      |
|                                                         | Illness                        | 17 | 7.19 [4.44, 11.62]     | 18.43 [8.41, 40.38] |

|                          |                                                   |    |                      |                      |
|--------------------------|---------------------------------------------------|----|----------------------|----------------------|
|                          | Feeling jittery                                   | 6  | 6.89 [3.08, 15.37]   | 1.25 [0.54, 2.93]    |
|                          | Feeling abnormal                                  | 64 | 6.19 [4.8, 7.99]     | 1.75 [1.33, 2.29]    |
|                          | Performance status decreased                      | 1  | 5.04 [0.71, 35.83]   | -                    |
|                          | Localised oedema                                  | 1  | 4.89 [0.69, 34.75]   | -                    |
|                          | Crying                                            | 5  | 2.95 [1.22, 7.1]     | 2.67 [1, 7.13]       |
|                          | Feeling drunk                                     | 1  | 2.93 [0.41, 20.83]   | 0.59 [0.08, 4.43]    |
|                          | Feeling cold                                      | 2  | 1.63 [0.41, 6.52]    | 3.04 [0.63, 14.67]   |
|                          | Fatigue                                           | 45 | 1.41 [1.05, 1.91]    | 2.28 [1.64, 3.17]    |
|                          | Face oedema                                       | 1  | 1.36 [0.19, 9.7]     | 10.65 [0.67, 170.36] |
|                          | Discomfort                                        | 3  | 1.16 [0.37, 3.6]     | 2.91 [0.81, 10.44]   |
|                          | Swelling face                                     | 3  | 1.06 [0.34, 3.3]     | 2.91 [0.81, 10.44]   |
|                          | Gait inability                                    | 2  | 0.81 [0.2, 3.24]     | 5.33 [0.97, 29.13]   |
|                          | Malaise                                           | 12 | 0.61 [0.34, 1.07]    | 1.07 [0.59, 1.95]    |
|                          | Chest pain                                        | 4  | 0.48 [0.18, 1.28]    | 1.29 [0.46, 3.65]    |
|                          | Chest discomfort                                  | 2  | 0.46 [0.12, 1.86]    | 0.92 [0.22, 3.93]    |
|                          | Chills                                            | 2  | 0.39 [0.1, 1.57]     | 1.12 [0.26, 4.82]    |
|                          | Asthenia                                          | 6  | 0.37 [0.17, 0.83]    | 1.16 [0.5, 2.71]     |
|                          | Peripheral swelling                               | 2  | 0.32 [0.08, 1.29]    | 3.04 [0.63, 14.67]   |
|                          | Condition aggravated                              | 3  | 0.27 [0.09, 0.83]    | 1.88 [0.55, 6.43]    |
|                          | Influenza like illness                            | 1  | 0.26 [0.04, 1.86]    | 1.52 [0.19, 12.37]   |
|                          | Gait disturbance                                  | 2  | 0.23 [0.06, 0.92]    | 0.57 [0.14, 2.39]    |
|                          | Swelling                                          | 1  | 0.2 [0.03, 1.46]     | 3.55 [0.37, 34.15]   |
|                          | Pain                                              | 4  | 0.14 [0.05, 0.38]    | 0.82 [0.29, 2.26]    |
| Lifestyle issues         | Impaired driving ability                          | 2  | 3.94 [0.98, 15.77]   | 2.66 [0.56, 12.56]   |
|                          | Loss of personal independence in daily activities | 7  | 2.47 [1.17, 5.19]    | 10.71 [3.75, 30.62]  |
|                          | Impaired work ability                             | 2  | 2.04 [0.51, 8.16]    | 4.26 [0.83, 22]      |
| Deliria (incl confusion) | Delirium                                          | 2  | 1.63 [0.41, 6.54]    | 0.23 [0.06, 0.95]    |
|                          | Disorientation                                    | 2  | 1.13 [0.28, 4.52]    | 0.66 [0.16, 2.77]    |
|                          | Confusional state                                 | 7  | 1.01 [0.48, 2.12]    | 0.93 [0.43, 2.02]    |
|                          | Intercepted product prescribing error             | 1  | 15.59 [2.19, 110.92] | 10.65 [0.67, 170.36] |

|                                                           |                                                  |    |                      |                      |
|-----------------------------------------------------------|--------------------------------------------------|----|----------------------|----------------------|
| Medication errors and other product use errors and issues | Product prescribing issue                        | 4  | 9.53 [3.57, 25.46]   | 3.28 [1.07, 10.09]   |
|                                                           | Intercepted product dispensing error             | 1  | 8.41 [1.18, 59.8]    | 10.65 [0.67, 170.36] |
|                                                           | Inappropriate schedule of product administration | 48 | 5.47 [4.08, 7.32]    | 6.31 [4.39, 9.05]    |
|                                                           | Product prescribing error                        | 8  | 4.36 [2.18, 8.76]    | 5.72 [2.42, 13.52]   |
|                                                           | Wrong technique in product usage process         | 35 | 3.7 [2.64, 5.19]     | 1.78 [1.24, 2.56]    |
|                                                           | Product dispensing error                         | 3  | 1.96 [0.63, 6.1]     | 8 [1.79, 35.81]      |
|                                                           | Contraindicated product administered             | 2  | 1.72 [0.43, 6.9]     | 2.37 [0.51, 10.97]   |
|                                                           | Product use issue                                | 4  | 0.55 [0.21, 1.48]    | 0.37 [0.14, 1]       |
|                                                           | Product storage error                            | 1  | 0.32 [0.04, 2.24]    | 0.48 [0.06, 3.59]    |
|                                                           | Incorrect dose administered                      | 1  | 0.13 [0.02, 0.89]    | 0.26 [0.04, 1.88]    |
| Nervous system, skull and spine therapeutic procedures    | Spinal operation                                 | 1  | 2.45 [0.34, 17.43]   | 10.65 [0.67, 170.36] |
| Oral soft tissue conditions                               | Lip exfoliation                                  | 1  | 17.74 [2.49, 126.19] | -                    |
|                                                           | Oral mucosal eruption                            | 1  | 15.95 [2.24, 113.49] | -                    |
|                                                           | Cheilitis                                        | 1  | 4.2 [0.59, 29.88]    | -                    |
|                                                           | Lip swelling                                     | 3  | 2.1 [0.68, 6.53]     | 4 [1.06, 15.1]       |
|                                                           | Paraesthesia oral                                | 1  | 1.66 [0.23, 11.8]    | 2.66 [0.3, 23.83]    |
|                                                           | Hypoaesthesia oral                               | 1  | 1.51 [0.21, 10.74]   | 1.33 [0.17, 10.64]   |
|                                                           | Stomatitis                                       | 2  | 0.83 [0.21, 3.31]    | 10.66 [1.5, 75.76]   |
| Skin appendage conditions                                 | Night sweats                                     | 11 | 8.48 [4.68, 15.38]   | 3.94 [1.97, 7.89]    |
|                                                           | Hyperhidrosis                                    | 8  | 1.41 [0.7, 2.82]     | 1.78 [0.84, 3.77]    |
|                                                           | Alopecia                                         | 2  | 0.23 [0.06, 0.92]    | 10.66 [1.5, 75.76]   |
| Cytogenetic investigations and genetic analyses           | Gene mutation identification test positive       | 1  | 58.4 [8.19, 416.38]  | -                    |
| Ocular sensory symptoms NEC                               | Asthenopia                                       | 1  | 4.44 [0.62, 31.57]   | 3.55 [0.37, 34.15]   |
| Eye disorders NEC                                         | Periorbital swelling                             | 1  | 6.98 [0.98, 49.62]   | 10.65 [0.67, 170.36] |
|                                                           | Ocular discomfort                                | 1  | 2.74 [0.39, 19.49]   | 10.65 [0.67, 170.36] |
|                                                           | Eye swelling                                     | 2  | 1.27 [0.32, 5.11]    | 7.1 [1.19, 42.58]    |
|                                                           | Dry eye                                          | 1  | 0.59 [0.08, 4.2]     | 1.77 [0.21, 14.75]   |
|                                                           | Eye pain                                         | 1  | 0.47 [0.07, 3.34]    | 1.06 [0.14, 8.32]    |

|                                                            |                                 |    |                    |                    |
|------------------------------------------------------------|---------------------------------|----|--------------------|--------------------|
| Urinary tract signs and symptoms                           | Nocturia                        | 4  | 8.13 [3.04, 21.72] | 3.05 [1, 9.28]     |
|                                                            | Pollakiuria                     | 3  | 1.66 [0.53, 5.16]  | 1.45 [0.43, 4.86]  |
|                                                            | Urinary incontinence            | 1  | 0.78 [0.11, 5.52]  | 1.77 [0.21, 14.75] |
| Mood disorders and disturbances<br>NEC                     | Euphoric mood                   | 1  | 2.08 [0.29, 14.79] | 1.06 [0.14, 8.32]  |
|                                                            | Frustration tolerance decreased | 1  | 1.96 [0.28, 13.94] | 1.06 [0.14, 8.32]  |
|                                                            | Mood altered                    | 2  | 1.71 [0.43, 6.86]  | 1.52 [0.34, 6.7]   |
|                                                            | Irritability                    | 4  | 1.49 [0.56, 3.97]  | 1.06 [0.38, 2.98]  |
|                                                            | Mood swings                     | 2  | 1.36 [0.34, 5.45]  | 7.1 [1.19, 42.58]  |
|                                                            | Emotional distress              | 1  | 0.16 [0.02, 1.16]  | 1.77 [0.21, 14.75] |
| Angioedema and urticaria                                   | Urticaria                       | 6  | 0.88 [0.39, 1.96]  | 3.38 [1.34, 8.47]  |
| Personality disorders and<br>disturbances in behaviour     | Paranoia                        | 2  | 2.62 [0.65, 10.48] | 2.13 [0.47, 9.74]  |
|                                                            | Aggression                      | 1  | 0.45 [0.06, 3.18]  | 0.39 [0.05, 2.9]   |
| Mental impairment disorders                                | Disturbance in attention        | 5  | 2.11 [0.87, 5.07]  | 2.22 [0.85, 5.84]  |
|                                                            | Memory impairment               | 3  | 0.5 [0.16, 1.55]   | 0.42 [0.13, 1.35]  |
|                                                            | Amnesia                         | 1  | 0.34 [0.05, 2.39]  | 0.17 [0.02, 1.21]  |
| Tongue conditions                                          | Swollen tongue                  | 2  | 1.43 [0.36, 5.72]  | 1.94 [0.43, 8.75]  |
| Muscle disorders                                           | Muscle twitching                | 3  | 2.98 [0.96, 9.27]  | 2.66 [0.75, 9.46]  |
|                                                            | Muscle rigidity                 | 1  | 2.12 [0.3, 15.05]  | 2.13 [0.25, 18.24] |
|                                                            | Muscular weakness               | 3  | 0.62 [0.2, 1.92]   | 0.59 [0.18, 1.89]  |
|                                                            | Muscle spasms                   | 5  | 0.61 [0.25, 1.47]  | 1.57 [0.61, 4.02]  |
|                                                            | Myalgia                         | 3  | 0.41 [0.13, 1.27]  | 1 [0.3, 3.26]      |
| Cardiac and vascular investigations<br>(excl enzyme tests) | Heart rate increased            | 5  | 1.18 [0.49, 2.84]  | 1.57 [0.61, 4.02]  |
|                                                            | Heart rate irregular            | 1  | 0.94 [0.13, 6.69]  | 2.66 [0.3, 23.83]  |
|                                                            | Blood pressure increased        | 4  | 0.6 [0.23, 1.61]   | 1.42 [0.5, 4.04]   |
|                                                            | Blood pressure decreased        | 1  | 0.35 [0.05, 2.49]  | 0.71 [0.09, 5.37]  |
| Gastrointestinal signs and<br>symptoms                     | Abdominal discomfort            | 8  | 1.1 [0.55, 2.21]   | 1.99 [0.93, 4.24]  |
|                                                            | Nausea                          | 23 | 0.68 [0.45, 1.03]  | 1.24 [0.8, 1.91]   |
|                                                            | Abdominal pain upper            | 5  | 0.57 [0.24, 1.38]  | 2.22 [0.85, 5.84]  |
|                                                            | Vomiting                        | 7  | 0.35 [0.17, 0.75]  | 1.08 [0.49, 2.36]  |
|                                                            | Dysphagia                       | 1  | 0.24 [0.03, 1.7]   | 0.48 [0.06, 3.59]  |
|                                                            | Dyspepsia                       | 1  | 0.24 [0.03, 1.7]   | 0.59 [0.08, 4.43]  |

|                                                      |                                  |    |                    |                      |
|------------------------------------------------------|----------------------------------|----|--------------------|----------------------|
|                                                      | Abdominal distension             | 1  | 0.23 [0.03, 1.63]  | 1.52 [0.19, 12.37]   |
|                                                      | Abdominal pain                   | 1  | 0.1 [0.01, 0.72]   | 0.53 [0.07, 3.96]    |
| Aural disorders NEC                                  | Ear discomfort                   | 1  | 2.31 [0.33, 16.44] | 10.65 [0.67, 170.36] |
| Gastrointestinal motility and defaecation conditions | Diarrhoea haemorrhagic           | 1  | 2.54 [0.36, 18.03] | -                    |
|                                                      | Irritable bowel syndrome         | 1  | 1.16 [0.16, 8.24]  | -                    |
|                                                      | Diarrhoea                        | 15 | 0.57 [0.34, 0.94]  | 1.64 [0.95, 2.84]    |
|                                                      | Constipation                     | 4  | 0.46 [0.17, 1.22]  | 1.85 [0.64, 5.37]    |
|                                                      | Gastrooesophageal reflux disease | 1  | 0.28 [0.04, 2.02]  | 0.82 [0.11, 6.26]    |
| Epidermal and dermal conditions                      | Skin odour abnormal              | 1  | 5.75 [0.81, 40.88] | 10.65 [0.67, 170.36] |
|                                                      | Dermatitis contact               | 1  | 2.16 [0.3, 15.33]  | -                    |
|                                                      | Rash papular                     | 1  | 0.99 [0.14, 7.06]  | 10.65 [0.67, 170.36] |
|                                                      | Pruritus                         | 15 | 0.97 [0.58, 1.62]  | 2.52 [1.43, 4.44]    |
|                                                      | Rash                             | 15 | 0.79 [0.47, 1.32]  | 2.34 [1.33, 4.1]     |
|                                                      | Rash erythematous                | 1  | 0.58 [0.08, 4.1]   | 2.66 [0.3, 23.83]    |
|                                                      | Skin irritation                  | 1  | 0.48 [0.07, 3.41]  | -                    |
|                                                      | Erythema                         | 4  | 0.44 [0.16, 1.17]  | 3.05 [1, 9.28]       |
|                                                      | Psoriasis                        | 1  | 0.18 [0.02, 1.25]  | 5.32 [0.48, 58.76]   |
| Urolithiasis                                         | Nephrolithiasis                  | 1  | 0.53 [0.07, 3.76]  | 3.55 [0.37, 34.15]   |
| Respiratory disorders NEC                            | Respiratory tract congestion     | 1  | 1.5 [0.21, 10.68]  | -                    |
|                                                      | Dyspnoea                         | 20 | 0.82 [0.53, 1.28]  | 2.11 [1.3, 3.43]     |
|                                                      | Cough                            | 1  | 0.09 [0.01, 0.61]  | 0.38 [0.05, 2.79]    |
| Skin vascular abnormalities                          | Skin haemorrhage                 | 1  | 2.01 [0.28, 14.32] | 10.65 [0.67, 170.36] |
| Respiratory tract signs and symptoms                 | Yawning                          | 1  | 8.43 [1.19, 59.94] | 5.32 [0.48, 58.76]   |
|                                                      | Snoring                          | 1  | 6.2 [0.87, 44.08]  | 10.65 [0.67, 170.36] |
|                                                      | Throat tightness                 | 3  | 2.55 [0.82, 7.93]  | 4 [1.06, 15.1]       |
|                                                      | Throat irritation                | 1  | 0.54 [0.08, 3.8]   | 5.32 [0.48, 58.76]   |
|                                                      | Oropharyngeal pain               | 1  | 0.25 [0.04, 1.81]  | 1.77 [0.21, 14.75]   |
| Cranial nerve disorders (excl neoplasms)             | Parosmia                         | 1  | 3.1 [0.44, 22.02]  | 10.65 [0.67, 170.36] |
| Toxicology and therapeutic drug monitoring           | Drug screen false positive       | 1  | 7.49 [1.05, 53.26] | 3.55 [0.37, 34.15]   |

|                                                            |                               |   |                      |                      |
|------------------------------------------------------------|-------------------------------|---|----------------------|----------------------|
| Appetite and general nutritional disorders                 | Increased appetite            | 1 | 1.42 [0.2, 10.1]     | 1.33 [0.17, 10.64]   |
|                                                            | Decreased appetite            | 4 | 0.39 [0.15, 1.05]    | 2.03 [0.7, 5.93]     |
| Vulvovaginal disorders (excl infections and inflammations) | Vaginal disorder              | 1 | 22.57 [3.17, 160.58] | -                    |
|                                                            | Vulvovaginal dryness          | 1 | 7.13 [1, 50.72]      | 10.65 [0.67, 170.36] |
| Upper respiratory tract disorders (excl infections)        | Pharyngeal swelling           | 1 | 3.3 [0.46, 23.44]    | -                    |
|                                                            | Nasal congestion              | 1 | 0.42 [0.06, 3.01]    | 3.55 [0.37, 34.15]   |
|                                                            | Epistaxis                     | 1 | 0.31 [0.04, 2.19]    | 1.52 [0.19, 12.37]   |
| Viral infectious disorders                                 | COVID-19 pneumonia            | 1 | 2.61 [0.37, 18.57]   | 10.65 [0.67, 170.36] |
|                                                            | Gastroenteritis viral         | 1 | 1.36 [0.19, 9.65]    | -                    |
|                                                            | Influenza                     | 2 | 0.45 [0.11, 1.81]    | 1.94 [0.43, 8.75]    |
|                                                            | COVID-19                      | 2 | 0.34 [0.08, 1.34]    | 2.66 [0.56, 12.56]   |
| Hearing disorders                                          | Deafness                      | 1 | 0.93 [0.13, 6.63]    | 5.32 [0.48, 58.76]   |
| Vascular disorders NEC                                     | Hot flush                     | 3 | 1 [0.32, 3.11]       | 4 [1.06, 15.1]       |
| Off label uses and intentional product misuses/use issues  | Intentional dose omission     | 2 | 3.45 [0.86, 13.81]   | 4.26 [0.83, 22]      |
|                                                            | Intentional product misuse    | 3 | 0.64 [0.2, 1.97]     | 0.76 [0.23, 2.45]    |
|                                                            | Intentional product use issue | 1 | 0.32 [0.04, 2.26]    | 0.51 [0.07, 3.77]    |
|                                                            | Off label use                 | 3 | 0.11 [0.03, 0.33]    | 0.78 [0.24, 2.52]    |
| Vision disorders                                           | Photopsia                     | 1 | 3.57 [0.5, 25.41]    | 1.77 [0.21, 14.75]   |
|                                                            | Diplopia                      | 1 | 0.94 [0.13, 6.65]    | 5.32 [0.48, 58.76]   |
|                                                            | Vision blurred                | 2 | 0.34 [0.09, 1.38]    | 1.33 [0.31, 5.79]    |
|                                                            | Visual impairment             | 1 | 0.19 [0.03, 1.34]    | 0.66 [0.09, 5.02]    |
| Cardiac arrhythmias                                        | Tachycardia                   | 4 | 1.13 [0.42, 3.01]    | 3.28 [1.07, 10.09]   |
|                                                            | Arrhythmia                    | 1 | 0.48 [0.07, 3.44]    | 0.82 [0.11, 6.26]    |
| Fatal outcomes                                             | Death                         | 8 | 0.22 [0.11, 0.44]    | 2.04 [0.95, 4.35]    |
| Dental and gingival conditions                             | Noninfective gingivitis       | 1 | 16.11 [2.26, 114.58] | -                    |
| Injuries NEC                                               | Accident at home              | 1 | 45.52 [6.39, 324.31] | -                    |
|                                                            | Gun shot wound                | 1 | 10.83 [1.52, 77.01]  | 10.65 [0.67, 170.36] |
|                                                            | Concussion                    | 1 | 3.05 [0.43, 21.66]   | 0.97 [0.12, 7.5]     |
|                                                            | Scratch                       | 1 | 2.71 [0.38, 19.27]   | 1.77 [0.21, 14.75]   |
|                                                            | Fall                          | 4 | 0.28 [0.1, 0.74]     | 0.41 [0.15, 1.12]    |
|                                                            | Body temperature increased    | 2 | 2.2 [0.55, 8.81]     | 21.32 [1.93, 235.34] |

|                                                              |                            |   |                         |                      |
|--------------------------------------------------------------|----------------------------|---|-------------------------|----------------------|
| Physical examination and organ system status topics          | Weight increased           | 3 | 0.32 [0.1, 0.98]        | 0.86 [0.27, 2.8]     |
| Musculoskeletal and connective tissue disorders NEC          | Musculoskeletal discomfort | 1 | 1.35 [0.19, 9.59]       | 3.55 [0.37, 34.15]   |
|                                                              | Mobility decreased         | 1 | 0.33 [0.05, 2.35]       | 1.77 [0.21, 14.75]   |
|                                                              | Pain in extremity          | 4 | 0.3 [0.11, 0.8]         | 1.12 [0.4, 3.15]     |
|                                                              | Musculoskeletal stiffness  | 1 | 0.26 [0.04, 1.88]       | 0.82 [0.11, 6.26]    |
| Seizures (incl subtypes)                                     | Seizure like phenomena     | 1 | 16.51 [2.32, 117.43]    | 3.55 [0.37, 34.15]   |
|                                                              | Seizure                    | 1 | 0.14 [0.02, 0.98]       | 0.2 [0.03, 1.47]     |
| Hepatic and hepatobiliary disorders                          | Hepatic pain               | 1 | 5.36 [0.75, 38.11]      | 10.65 [0.67, 170.36] |
|                                                              | Liver disorder             | 1 | 0.55 [0.08, 3.92]       | 1.33 [0.17, 10.64]   |
| Ocular infections, irritations and inflammations             | Eye pruritus               | 1 | 0.85 [0.12, 6.06]       | 10.65 [0.67, 170.36] |
| Therapeutic procedures and supportive care NEC               | Interventional procedure   | 1 | 357.16 [49.32, 2586.57] | -                    |
|                                                              | Therapy interrupted        | 1 | 0.64 [0.09, 4.54]       | -                    |
| Bronchial disorders (excl neoplasms)                         | Asthma                     | 1 | 0.24 [0.03, 1.68]       | 3.55 [0.37, 34.15]   |
| Bone disorders (excl congenital and fractures)               | Spinal disorder            | 1 | 2.37 [0.33, 16.88]      | 3.55 [0.37, 34.15]   |
| Gastrointestinal haemorrhages NEC                            | Rectal haemorrhage         | 1 | 0.52 [0.07, 3.71]       | 5.32 [0.48, 58.76]   |
| Decreased and nonspecific blood pressure disorders and shock | Hypotension                | 1 | 0.12 [0.02, 0.88]       | 1.33 [0.17, 10.64]   |
| Infections - pathogen unspecified                            | Infected skin ulcer        | 1 | 11.81 [1.66, 83.96]     | -                    |
|                                                              | Oral infection             | 1 | 5.8 [0.82, 41.24]       | -                    |
|                                                              | Pharyngitis                | 1 | 1.82 [0.26, 12.94]      | 10.65 [0.67, 170.36] |
|                                                              | Sinusitis                  | 1 | 0.23 [0.03, 1.61]       | 2.13 [0.25, 18.24]   |
|                                                              | Pneumonia                  | 2 | 0.14 [0.03, 0.56]       | 0.82 [0.19, 3.45]    |
| Psychiatric disorders NEC                                    | Mental disorder            | 1 | 0.53 [0.08, 3.79]       | 0.48 [0.06, 3.59]    |
| Central nervous system vascular disorders                    | Transient ischaemic attack | 1 | 0.65 [0.09, 4.6]        | 1.77 [0.21, 14.75]   |
| Metabolic, nutritional and blood gas investigations          | Blood glucose increased    | 1 | 0.12 [0.02, 0.82]       | 1.18 [0.15, 9.34]    |
| Renal disorders (excl nephropathies)                         | Renal disorder             | 1 | 0.5 [0.07, 3.54]        | 3.55 [0.37, 34.15]   |

|                 |                      |   |                   |                      |
|-----------------|----------------------|---|-------------------|----------------------|
| Joint disorders | Joint stiffness      | 1 | 0.87 [0.12, 6.21] | 5.32 [0.48, 58.76]   |
|                 | Rheumatoid arthritis | 1 | 0.21 [0.03, 1.49] | -                    |
|                 | Joint swelling       | 1 | 0.2 [0.03, 1.42]  | 10.65 [0.67, 170.36] |

<sup>a</sup>ICSR; Individual Case Safety Report

<sup>b</sup>RG1; Reference Group 1, report relative to all other drugs in the FAERS database

<sup>c</sup>RG2; Reference Group 2, report relative to other DORAs
